# Supplementary material for: Domain-adaptive neural networks improve cross-species prediction of transcription factor binding
Source: HighWire-hosted journal article supplement (doi:10.1101/gr.275394.121), 2022-01-18
Supplement: Supplemental_Fig_1.pdf [file Supplemental_Fig_1.pdf]

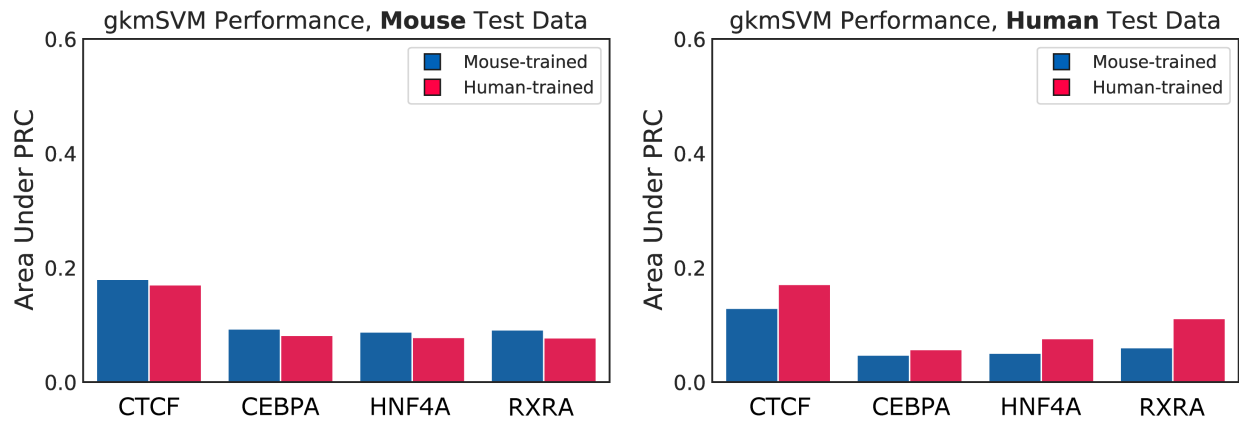

**Supplemental Figure 1:** Results of evaluating the performance of mouse-trained (blue) and human-trained (red) gapped  $k$ -mer SVM models on non-overlapping windows from the mouse (left) and human (right) test datasets (Chromosome 2). For each TF and species, an SVM was trained using a balanced set of bound and unbound windows from the original training set.
