# Supplementary material for: Domain-adaptive neural networks improve cross-species prediction of transcription factor binding
Source: HighWire-hosted journal article supplement (doi:10.1101/gr.275394.121), 2022-01-18
Supplement: Supplemental_Fig_2.pdf [file Supplemental_Fig_2.pdf]

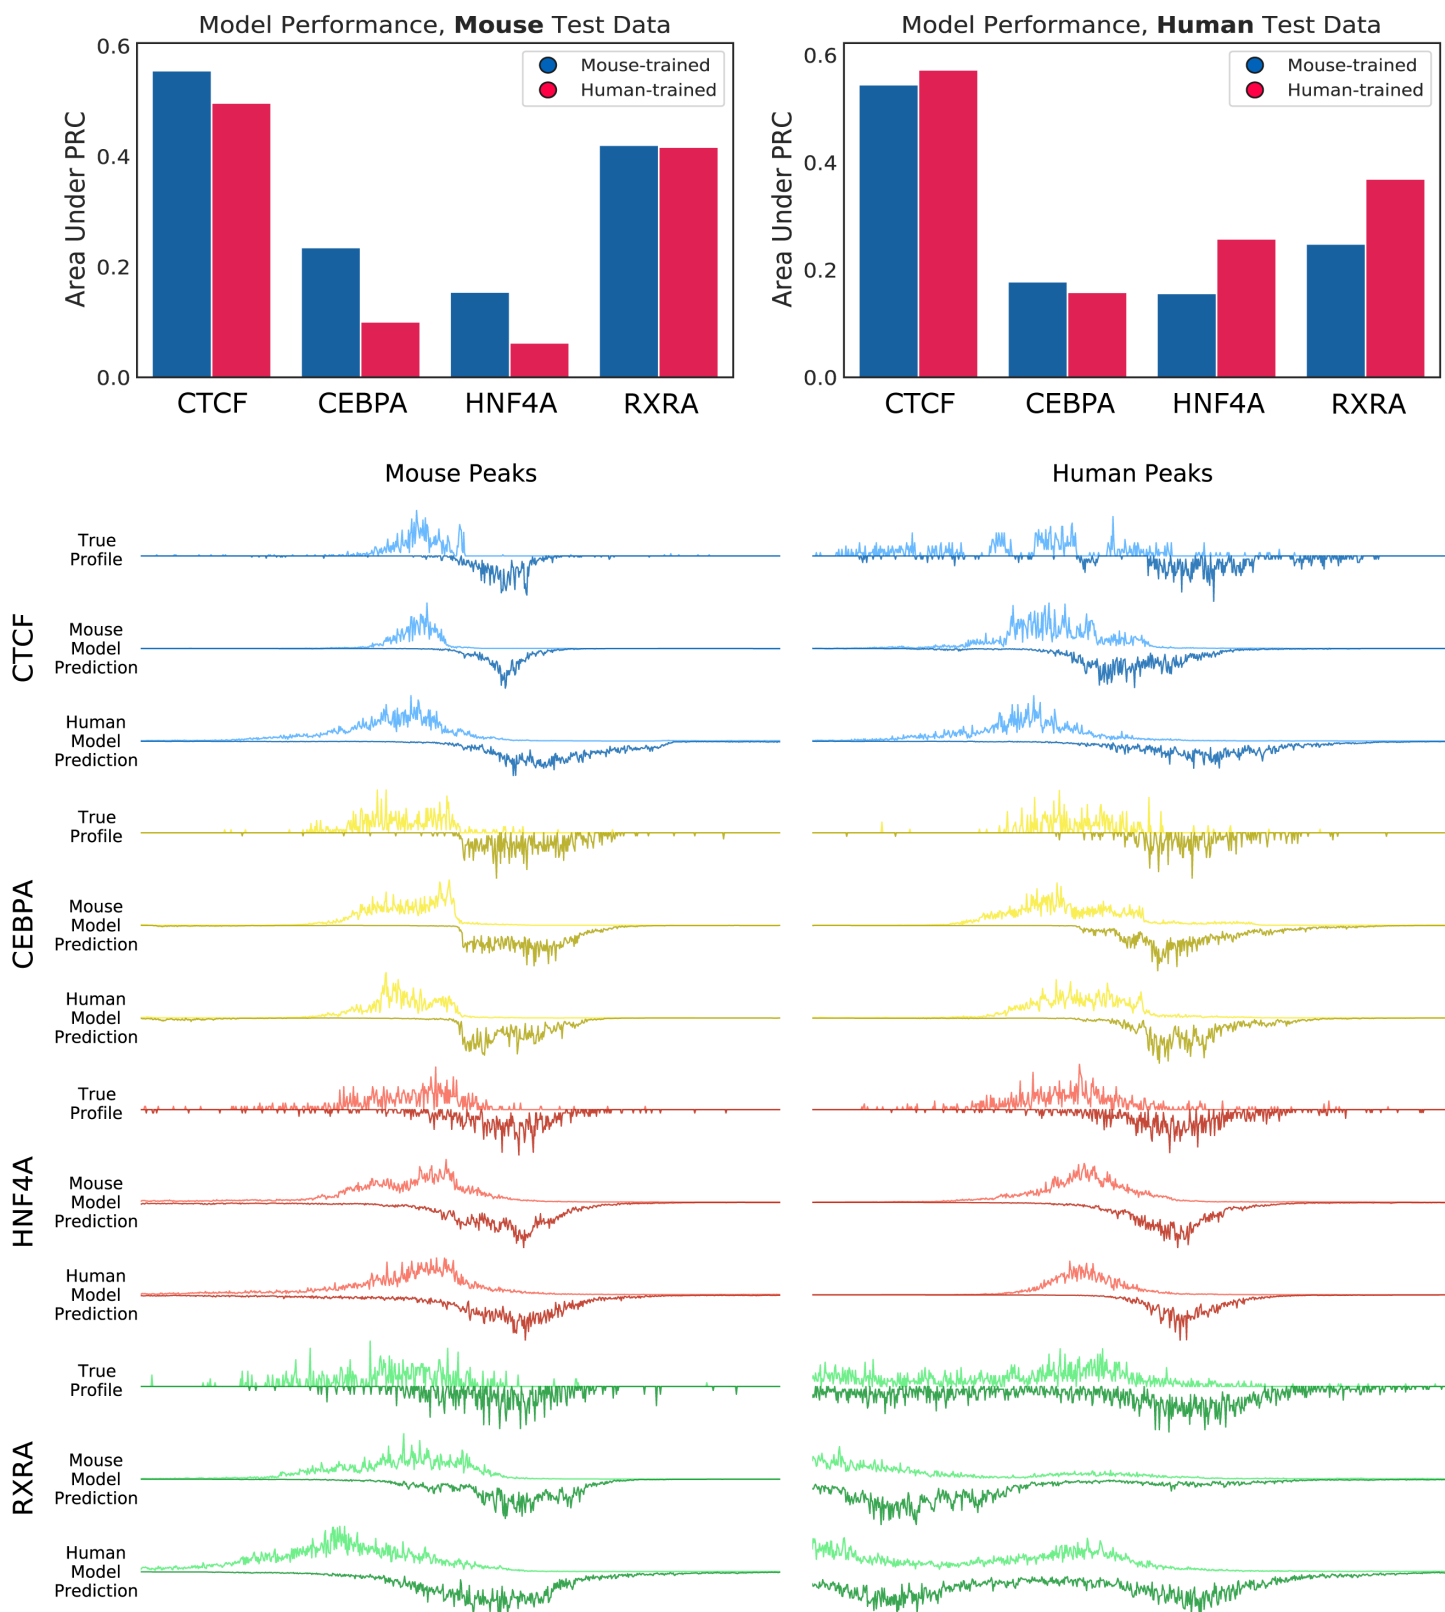

**Supplemental Figure 2:** Top: results from evaluating the performance of mouse-trained (blue/left) and human-trained (red/right) profile models on non-overlapping windows from the human (left panel) and mouse (right panel) test datasets (Chromosome 2). Bottom: example predicted vs. true ChIP-seq read distribution profiles from mouse (left) and human (right) test datasets. See Methods for profile model details.
