# Supplementary material for: Domain-adaptive neural networks improve cross-species prediction of transcription factor binding
Source: HighWire-hosted journal article supplement (doi:10.1101/gr.275394.121), 2022-01-18
Supplement: Supplemental_Fig_5.pdf [file Supplemental_Fig_5.pdf]

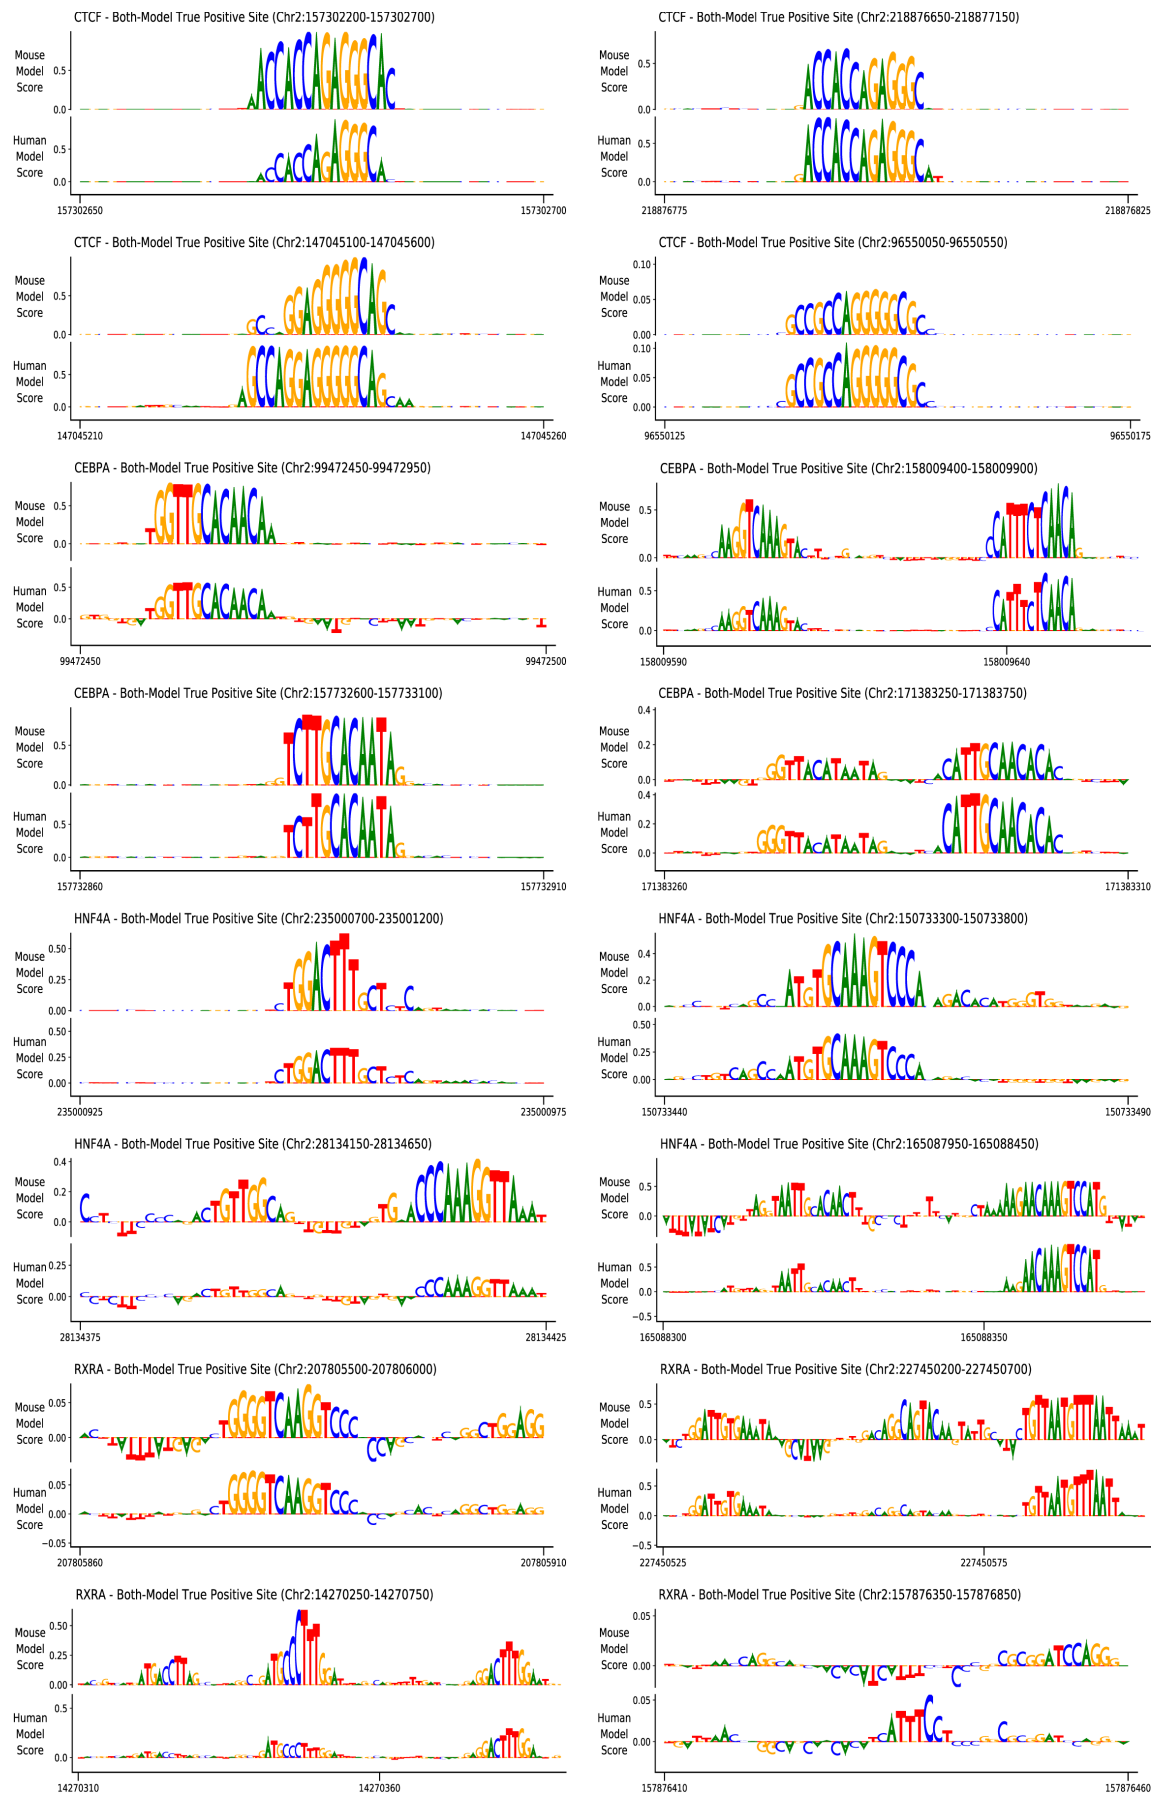

**Supplemental Figure 5:** Importance scores for example both-model true positive sites for the four TFs. Bases were scored using a modified ISM algorithm (see Methods). The 500bp example sites have been enlarged and cropped around motif-like instances for readability.
