# Supplementary material for: Domain-adaptive neural networks improve cross-species prediction of transcription factor binding
Source: HighWire-hosted journal article supplement (doi:10.1101/gr.275394.121), 2022-01-18
Supplement: Supplemental_Fig_6.pdf [file Supplemental_Fig_6.pdf]

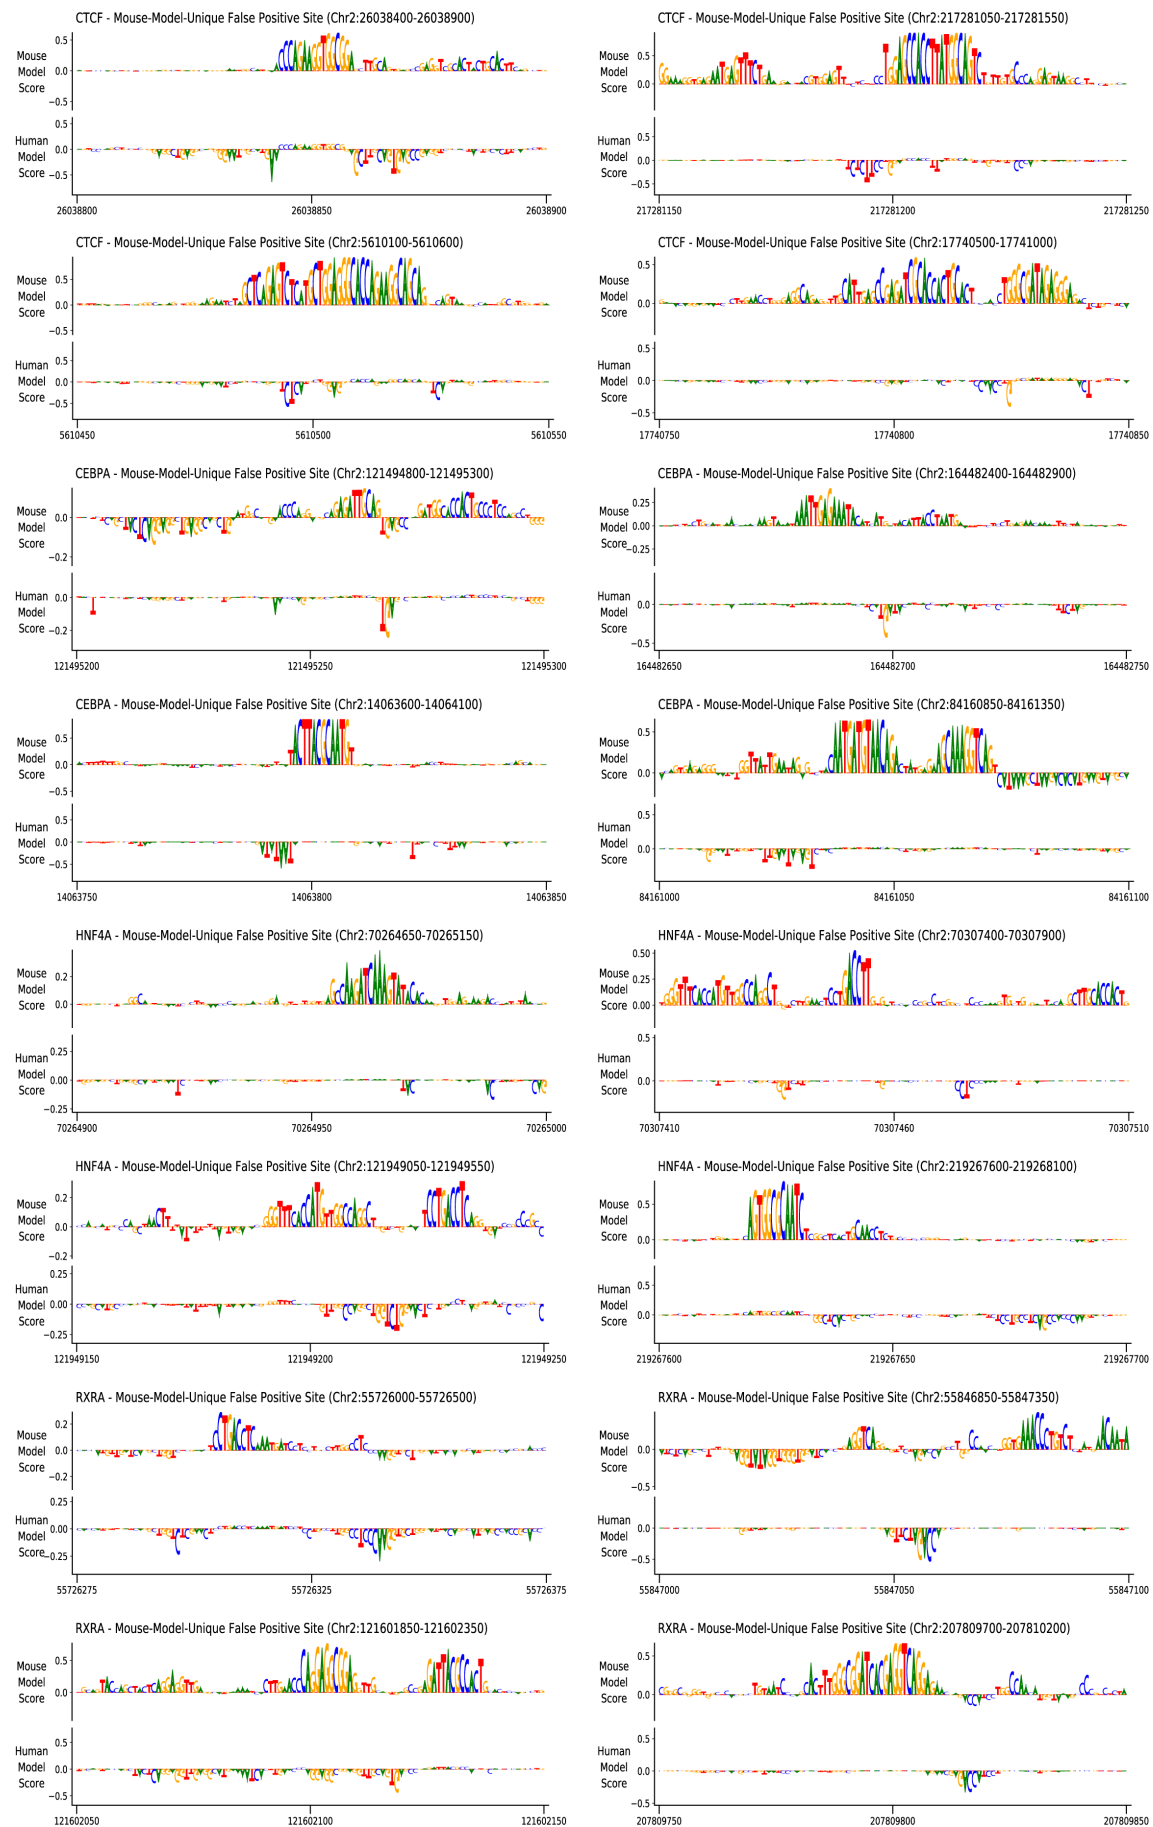

**Supplemental Figure 6:** Importance scores for example false positive sites mispredicted only by the mouse model. Bases were scored using a modified ISM algorithm (see Methods).
