# Supplementary material for: Domain-adaptive neural networks improve cross-species prediction of transcription factor binding
Source: HighWire-hosted journal article supplement (doi:10.1101/gr.275394.121), 2022-01-18
Supplement: Supplemental_Fig_7.pdf [file Supplemental_Fig_7.pdf]

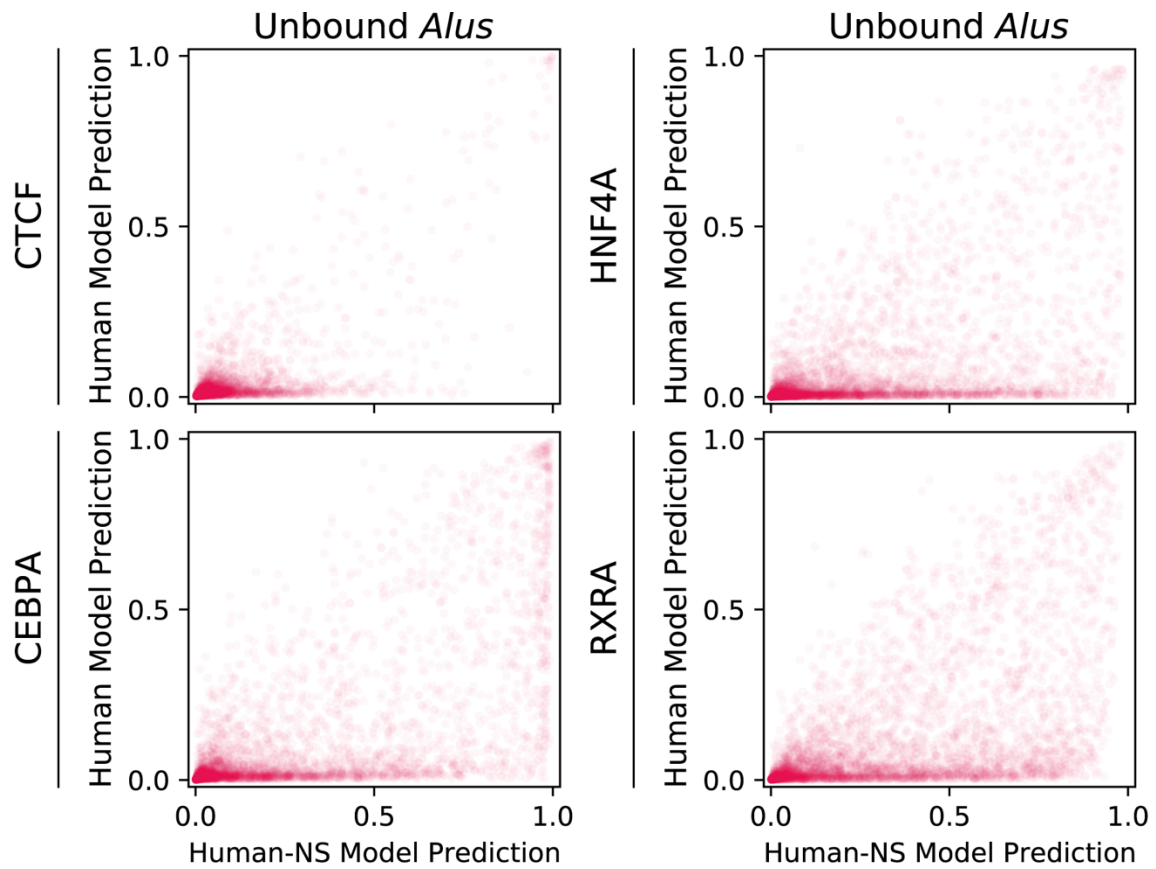

**Supplemental Figure 7:** Comparison between the predictions of human-trained models that were trained without examples overlapping SINEs (x-axis) to the predictions of standard human-trained models (y-axis). Unbound *Alu* repeats make up a large part of the false positives unique to the no-SINEs model. For visual clarity, only 5% of windows are shown.
