# Supplementary material for: Domain-adaptive neural networks improve cross-species prediction of transcription factor binding
Source: HighWire-hosted journal article supplement (doi:10.1101/gr.275394.121), 2022-01-18
Supplement: Supplemental_Fig_8.pdf [file Supplemental_Fig_8.pdf]

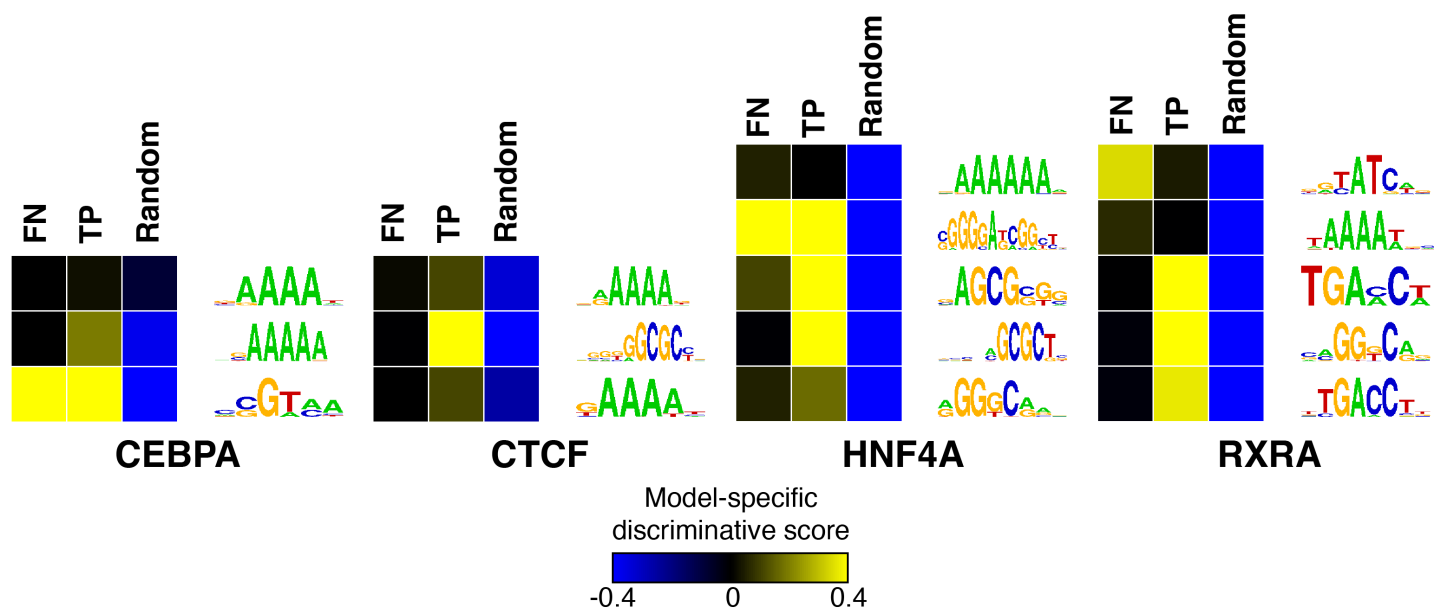

**Supplemental Figure 8:** False negative predictions unique to mouse-trained models trained with domain adaptation, compared to human-trained models, can be distinguished from true positive predictions through motif-like sequence features. See Methods for site categorization details.
