# Supplementary material for: Domain-adaptive neural networks improve cross-species prediction of transcription factor binding
Source: HighWire-hosted journal article supplement (doi:10.1101/gr.275394.121), 2022-01-18
Supplement: Supplemental_Table_S1.pdf [file Supplemental_Table_S1.pdf]

| TF                    | Bound | FN (Both Models) | FN (Mouse Only) | Unbound | FP (Both Models) | FP (Mouse Only) |
|-----------------------|-------|------------------|-----------------|---------|------------------|-----------------|
| <b>DNA</b>            |       |                  |                 |         |                  |                 |
| CTCF                  | 10.1% | 11.4%            | 7.3%            | 11.4%   | 8.9%             | <b>9.0%</b>     |
| CEBPA                 | 12.3% | 10.4%            | 8.3%            | 11.3%   | 13.0%            | <b>9.2%</b>     |
| HNF4A                 | 10.7% | 12.0%            | 11.3%           | 11.4%   | 9.5%             | <b>9.0%</b>     |
| RXRA                  | 10.1% | 11.7%            | 8.8%            | 11.4%   | 10.0%            | <b>9.4%</b>     |
| <b>LINE</b>           |       |                  |                 |         |                  |                 |
| CTCF                  | 18.3% | 22.5%            | 21.3%           | 37.6%   | 17.8%            | <b>31.6%</b>    |
| CEBPA                 | 25.6% | 26.3%            | 25.0%           | 37.6%   | 29.0%            | <b>32.3%</b>    |
| HNF4A                 | 21.0% | 25.3%            | 26.3%           | 37.6%   | 21.5%            | <b>30.5%</b>    |
| RXRA                  | 21.0% | 27.9%            | 22.1%           | 37.8%   | 22.1%            | <b>33.2%</b>    |
| <b>Low Complexity</b> |       |                  |                 |         |                  |                 |
| CTCF                  | 2.5%  | 1.0%             | 2.6%            | 1.9%    | 4.0%             | <b>1.5%</b>     |
| CEBPA                 | 1.5%  | 1.4%             | 0.0%            | 1.9%    | 1.6%             | <b>1.4%</b>     |
| HNF4A                 | 2.0%  | 1.1%             | 1.5%            | 1.9%    | 2.4%             | <b>1.3%</b>     |
| RXRA                  | 2.1%  | 1.3%             | 2.0%            | 1.9%    | 2.2%             | <b>1.5%</b>     |
| <b>LTR</b>            |       |                  |                 |         |                  |                 |
| CTCF                  | 8.6%  | 12.6%            | 8.2%            | 17.6%   | 16.4%            | <b>15.5%</b>    |
| CEBPA                 | 12.8% | 12.5%            | 41.7%           | 17.6%   | 19.4%            | <b>14.0%</b>    |
| HNF4A                 | 13.3% | 15.0%            | 16.0%           | 17.6%   | 19.4%            | <b>12.6%</b>    |
| RXRA                  | 12.2% | 14.8%            | 9.8%            | 17.6%   | 18.2%            | <b>11.5%</b>    |
| <b>Simple Repeat</b>  |       |                  |                 |         |                  |                 |
| CTCF                  | 13.4% | 10.1%            | 10.9%           | 11.5%   | 15.8%            | <b>12.0%</b>    |
| CEBPA                 | 9.4%  | 8.6%             | 25.0%           | 11.6%   | 9.8%             | <b>11.9%</b>    |
| HNF4A                 | 12.3% | 11.4%            | 9.1%            | 11.5%   | 11.6%            | <b>12.8%</b>    |
| RXRA                  | 11.5% | 9.4%             | 13.3%           | 11.5%   | 11.1%            | <b>13.4%</b>    |
| <b>SINE</b>           |       |                  |                 |         |                  |                 |
| CTCF                  | 23.9% | 23.2%            | 20.6%           | 31.2%   | 18.4%            | <b>81.1%</b>    |
| CEBPA                 | 30.9% | 22.6%            | 41.7%           | 31.2%   | 35.2%            | <b>86.9%</b>    |
| HNF4A                 | 27.1% | 23.6%            | 22.6%           | 31.2%   | 28.9%            | <b>95.5%</b>    |
| RXRA                  | 27.1% | 25.3%            | 18.9%           | 31.3%   | 32.2%            | <b>97.6%</b>    |
| <b>Unknown</b>        |       |                  |                 |         |                  |                 |
| CTCF                  | 0.2%  | 0.1%             | 0.0%            | 0.2%    | 0.1%             | <b>0.0%</b>     |
| CEBPA                 | 0.3%  | 0.5%             | 0.0%            | 0.1%    | 0.2%             | <b>0.0%</b>     |
| HNF4A                 | 0.2%  | 0.1%             | 0.0%            | 0.2%    | 0.2%             | <b>0.0%</b>     |
| RXRA                  | 0.2%  | 0.3%             | 0.0%            | 0.1%    | 0.2%             | <b>0.0%</b>     |

Table S1: Percent of windows overlapping various RepeatMasker-defined repeat elements, for different categories of genomic windows from the held-out test set. Only RepeatMasker repeat classes with at least 500 distinct annotations within the testset are shown. FPs: false positives. FNs: false negatives. Mouse Only: specific to mouse-trained models. See Methods for more details on site categorization.
