# Supplementary material for: Domain-adaptive neural networks improve cross-species prediction of transcription factor binding
Source: HighWire-hosted journal article supplement (doi:10.1101/gr.275394.121), 2022-01-18
Supplement: Supplemental_Table_S2.pdf [file Supplemental_Table_S2.pdf]

| TF    | Bound | FN (Both Models) | FN (Mouse Only) | Unbound | FP (Both Models) | FP (Mouse Only) |
|-------|-------|------------------|-----------------|---------|------------------|-----------------|
| CTCF  | 12.6% | 13.5%            | 13.7%           | 21.3%   | 9.0%             | <b>28.8%</b>    |
| CEBPA | 18.3% | 16.8%            | 0.0%            | 21.3%   | 21.9%            | <b>49.5%</b>    |
| HNF4A | 13.6% | 14.8%            | 13.7%           | 21.3%   | 14.0%            | <b>34.3%</b>    |
| RXRA  | 13.7% | 17.7%            | 10.7%           | 21.4%   | 15.8%            | <b>58.7%</b>    |

Table S2: Percent of windows overlapping an *Alu* element when domain-adaptive mouse models are compared to human models (compare to Table 1). The fraction of mouse-model-unique false positives overlapping *Alu* elements (right-most column) have decreased notably for all TFs. FPs: false positives. FNs: false negatives.
