# Supplementary material for: Domain-adaptive neural networks improve cross-species prediction of transcription factor binding
Source: HighWire-hosted journal article supplement (doi:10.1101/gr.275394.121), 2022-01-18
Supplement: Supplemental_Table_S4.pdf [file Supplemental_Table_S4.pdf]

| TF                               | Basic Mouse Models |            |                  | Domain-adaptive Mouse Models |            |                  |
|----------------------------------|--------------------|------------|------------------|------------------------------|------------|------------------|
|                                  | Unbound            | FPs (Both) | FPs (Mouse Only) | Unbound                      | FPs (Both) | FPs (Mouse Only) |
| <b>Adipocytes</b>                |                    |            |                  |                              |            |                  |
| CEBPA                            | 21.3%              | 20.5%      | <b>76.5%</b>     | 21.3%                        | 19.5%      | <b>59.9%</b>     |
| CTCF                             | 21.3%              | 11.4%      | <b>86.7%</b>     | 21.3%                        | 9.8%       | <b>31.3%</b>     |
| PPARG                            | 21.4%              | 15.9%      | <b>68.1%</b>     | 21.4%                        | 14.8%      | <b>50.7%</b>     |
| <b>Erythroid Progenitors</b>     |                    |            |                  |                              |            |                  |
| CTCF                             | 21.3%              | 9.7%       | <b>42.0%</b>     | 21.3%                        | 9.8%       | <b>24.6%</b>     |
| GATA1                            | 21.3%              | 15.1%      | <b>62.1%</b>     | 21.3%                        | 14.5%      | <b>64.4%</b>     |
| TAL1                             | 21.3%              | 17.1%      | <b>86.3%</b>     | 21.3%                        | 14.0%      | <b>76.8%</b>     |
| <b>Erythroid Cells</b>           |                    |            |                  |                              |            |                  |
| BHLHE40                          | 21.3%              | 17.2%      | <b>63.5%</b>     | 21.3%                        | 16.0%      | <b>49.6%</b>     |
| CTCF                             | 21.3%              | 13.6%      | <b>61.4%</b>     | 21.3%                        | 11.6%      | <b>34.0%</b>     |
| E2F4                             | 21.3%              | 8.8%       | <b>71.1%</b>     | 21.3%                        | 8.2%       | <b>44.1%</b>     |
| ELF1                             | 21.3%              | 13.7%      | <b>58.9%</b>     | 21.3%                        | 12.8%      | <b>40.5%</b>     |
| ETS1                             | 21.3%              | 9.7%       | <b>35.0%</b>     | 21.3%                        | 8.9%       | <b>26.5%</b>     |
| GATA1                            | 21.3%              | 14.1%      | <b>41.8%</b>     | 21.3%                        | 13.7%      | <b>28.7%</b>     |
| JUND                             | 21.3%              | 20.6%      | <b>65.0%</b>     | 21.3%                        | 17.6%      | <b>54.6%</b>     |
| MAFK                             | 21.3%              | 15.7%      | <b>56.4%</b>     | 21.3%                        | 14.2%      | <b>35.2%</b>     |
| MAX                              | 21.3%              | 14.0%      | <b>72.2%</b>     | 21.3%                        | 13.0%      | <b>56.9%</b>     |
| MAZ                              | 21.3%              | 12.3%      | <b>87.6%</b>     | 21.3%                        | 11.2%      | <b>60.9%</b>     |
| MEF2A                            | 21.3%              | 12.5%      | <b>41.2%</b>     | 21.3%                        | 13.0%      | <b>36.3%</b>     |
| MXI1                             | 21.3%              | 13.2%      | <b>81.7%</b>     | 21.3%                        | 11.9%      | <b>55.9%</b>     |
| MYC                              | 21.3%              | 15.3%      | <b>68.5%</b>     | 21.3%                        | 14.0%      | <b>43.6%</b>     |
| NRF1                             | 21.3%              | 8.9%       | <b>65.4%</b>     | 21.3%                        | 8.8%       | <b>47.2%</b>     |
| TAL1                             | 21.3%              | 16.1%      | <b>38.8%</b>     | 21.3%                        | 15.4%      | <b>48.7%</b>     |
| UBTF                             | 21.3%              | 10.6%      | <b>97.6%</b>     | 21.3%                        | 9.4%       | <b>84.5%</b>     |
| USF1                             | 21.3%              | 14.8%      | <b>66.4%</b>     | 21.3%                        | 14.2%      | <b>55.3%</b>     |
| USF2                             | 21.3%              | 11.9%      | <b>73.8%</b>     | 21.3%                        | 11.5%      | <b>62.8%</b>     |
| <b>ESCs</b>                      |                    |            |                  |                              |            |                  |
| CTCF                             | 21.4%              | 14.9%      | <b>82.5%</b>     | 21.4%                        | 12.2%      | <b>31.5%</b>     |
| MAFK                             | 21.3%              | 13.5%      | <b>80.7%</b>     | 21.3%                        | 13.4%      | <b>76.8%</b>     |
| NANOG                            | 21.3%              | 10.3%      | <b>38.8%</b>     | 21.3%                        | 9.4%       | <b>26.7%</b>     |
| POU5F1                           | 21.3%              | 11.0%      | <b>40.9%</b>     | 21.3%                        | 9.8%       | <b>22.7%</b>     |
| <b>Hematopoietic Progenitors</b> |                    |            |                  |                              |            |                  |
| FLI1                             | 21.3%              | 6.9%       | <b>49.4%</b>     | 21.3%                        | 6.6%       | <b>34.5%</b>     |
| LMO2                             | 21.3%              | 6.0%       | <b>20.0%</b>     | 21.3%                        | 6.4%       | <b>29.6%</b>     |
| RUNX1                            | 21.3%              | 8.4%       | <b>25.5%</b>     | 21.3%                        | 7.9%       | <b>30.0%</b>     |
| SPI1                             | 21.5%              | 13.6%      | <b>9.0%</b>      | 21.5%                        | 13.0%      | <b>17.4%</b>     |

Continued on next page.

| TF                    | Basic Mouse Models |            |                  | Domain-adaptive Mouse Models |            |                  |
|-----------------------|--------------------|------------|------------------|------------------------------|------------|------------------|
|                       | Unbound            | FPs (Both) | FPs (Mouse Only) | Unbound                      | FPs (Both) | FPs (Mouse Only) |
| <b>Lymphoblasts</b>   |                    |            |                  |                              |            |                  |
| BHLHE40               | 21.3%              | 15.3%      | <b>67.5%</b>     | 21.3%                        | 14.0%      | <b>29.3%</b>     |
| CTCF                  | 21.3%              | 11.4%      | <b>70.8%</b>     | 21.3%                        | 10.8%      | <b>33.8%</b>     |
| E2F4                  | 21.3%              | 6.8%       | <b>51.2%</b>     | 21.3%                        | 6.6%       | <b>25.8%</b>     |
| ELF1                  | 21.3%              | 11.8%      | <b>41.5%</b>     | 21.3%                        | 10.4%      | <b>18.2%</b>     |
| ETS1                  | 21.3%              | 10.4%      | <b>32.8%</b>     | 21.3%                        | 9.7%       | <b>20.7%</b>     |
| IRF4                  | 21.3%              | 13.3%      | <b>52.9%</b>     | 21.3%                        | 12.2%      | <b>21.0%</b>     |
| JUND                  | 21.3%              | 12.6%      | <b>28.5%</b>     | 21.3%                        | 12.1%      | <b>25.8%</b>     |
| MAX                   | 21.3%              | 8.6%       | <b>61.3%</b>     | 21.3%                        | 8.2%       | <b>30.1%</b>     |
| MAZ                   | 21.3%              | 8.5%       | <b>50.4%</b>     | 21.3%                        | 8.2%       | <b>26.6%</b>     |
| MEF2A                 | 21.3%              | 17.3%      | <b>64.5%</b>     | 21.3%                        | 13.8%      | <b>14.7%</b>     |
| MXI1                  | 21.3%              | 11.6%      | <b>77.8%</b>     | 21.3%                        | 10.6%      | <b>43.6%</b>     |
| MYC                   | 21.3%              | 6.3%       | <b>47.6%</b>     | 21.3%                        | 5.8%       | <b>31.7%</b>     |
| NRF1                  | 21.3%              | 5.6%       | <b>26.6%</b>     | 21.3%                        | 5.6%       | <b>17.8%</b>     |
| TBP                   | 21.3%              | 14.3%      | <b>89.2%</b>     | 21.3%                        | 12.4%      | <b>56.4%</b>     |
| TCF12                 | 21.3%              | 11.6%      | <b>51.5%</b>     | 21.3%                        | 10.4%      | <b>17.5%</b>     |
| USF1                  | 21.3%              | 11.0%      | <b>64.6%</b>     | 21.3%                        | 10.5%      | <b>63.1%</b>     |
| USF2                  | 21.3%              | 11.4%      | <b>71.1%</b>     | 21.3%                        | 11.0%      | <b>71.2%</b>     |
| <b>Macrophages</b>    |                    |            |                  |                              |            |                  |
| SPI1                  | 21.4%              | 15.5%      | <b>27.2%</b>     | 21.4%                        | 14.2%      | <b>13.8%</b>     |
| <b>Megakaryocytes</b> |                    |            |                  |                              |            |                  |
| FLI1                  | 21.3%              | 8.4%       | <b>23.0%</b>     | 21.3%                        | 7.6%       | <b>18.1%</b>     |
| GATA1                 | 21.3%              | 7.6%       | <b>11.3%</b>     | 21.3%                        | 8.2%       | <b>19.4%</b>     |
| RUNX1                 | 21.3%              | 7.8%       | <b>15.7%</b>     | 21.3%                        | 8.2%       | <b>15.4%</b>     |

Table S4: The percent of sites overlapping an *Alu* element without (left column set) or with domain adaptation (right column set), for each of the additional datasets included in Figure 12. FPs: false positives; either the set of unbound sites mispredicted as bound by both the mouse model and the human model, or false positives mispredicted by the mouse model only. See Methods for site categorization details.
