# Supplementary material for: Domain-adaptive neural networks improve cross-species prediction of transcription factor binding
Source: HighWire-hosted journal article supplement (doi:10.1101/gr.275394.121), 2022-01-18
Supplement: Supplemental_Table_S5.pdf [file Supplemental_Table_S5.pdf]

| TF    | Species | Raw Peaks | Filtered Peaks | Bound Windows | Frac. Bound | Accession ID |
|-------|---------|-----------|----------------|---------------|-------------|--------------|
| CTCF  | Mouse   | 32006     | 28943          | 296117        | 0.71%       | ENCSR000CBU  |
|       | Human   | 29067     | 26477          | 270100        | 0.55%       | ENCSR911GFJ  |
| CEBPA | Mouse   | 62636     | 48812          | 566945        | 1.35%       | E-TABM-722   |
|       | Human   | 32243     | 28545          | 298066        | 0.61%       | E-TABM-722   |
| HNF4A | Mouse   | 44800     | 36540          | 415846        | 0.99%       | E-TABM-722   |
|       | Human   | 42766     | 34714          | 387077        | 0.79%       | E-TABM-722   |
| RXRA  | Mouse   | 46443     | 33751          | 404284        | 0.97%       | GSM1299600   |
|       | Human   | 95085     | 71032          | 854289        | 1.75%       | ENCSR098XMN  |

Table S5: For the primary experimental data used in this study, the following quantities are listed: the number of peaks called across the entire genome; the number of called peaks within the filtered window set, merged if within 500 bp of each other; the number of windows in the filtered window set labeled bound due to peak overlap; the fraction of the filtered window set labeled bound; and the database accession ID (ENCODE, GEO, or ArrayExpress). The size of the filtered window sets for the mouse and human genomes were 41883806 and 48742577, respectively.
